# Supplementary material for: Direct, gabapentin-insensitive interaction of a soluble form of the calcium channel subunit α2δ-1 with thrombospondin-4
Source: PubMed Central journal article supplement (PMC6838084; doi:10.1038/s41598-019-52655-y), 2019-11-07
Supplement: 41598_2019_52655_MOESM1_ESM.pdf [file 41598_2019_52655_MOESM1_ESM.pdf]

## Supplementary information

### Direct, gabapentin-insensitive interaction of a soluble form of the calcium channel subunit $\alpha_2\delta$ -1 with thrombospondin-4

Ehab El-Awaad;<sup>1,2</sup> Galyna Pryymachuk;<sup>3</sup> Cora Fried;<sup>1</sup> Jan Matthes;<sup>1</sup> Jörg Isensee;<sup>4</sup> Tim Hucho;<sup>4</sup> Wolfram F. Neiss;<sup>3</sup> Mats Paulsson;<sup>5,6</sup> Stefan Herzig;<sup>1,7</sup> Frank Zaucke;<sup>5,8</sup> Markus Pietsch<sup>1\*</sup>

<sup>1</sup> Institute II for Pharmacology, Centre of Pharmacology, Medical Faculty, University of Cologne, Gleueler Str. 24, D-50931 Cologne, Germany

<sup>2</sup> Department of Pharmacology, Faculty of Medicine, Assiut University, Assiut 71515, Egypt

<sup>3</sup> Department of Anatomy I, Medical Faculty, University of Cologne, Kerpener Str. 62, D-50937 Cologne, Germany

<sup>4</sup> Experimental Anaesthesiology and Pain Research, Department of Anaesthesiology and Intensive Care Medicine, Medical Faculty, University of Cologne, Robert-Koch-Str. 10, D-50931 Cologne, Germany

<sup>5</sup> Institute for Biochemistry II, Centre for Biochemistry, Medical Faculty, University of Cologne, Joseph-Stelzmann-Str. 52, D-50931 Cologne, Germany

<sup>6</sup> Centre for Molecular Medicine Cologne (CMMC), University of Cologne, Robert-Koch-Str. 21, D-50931 Cologne, Germany

<sup>7</sup> President of TH Köln, TH Köln (University of Applied Sciences), Claudiusstr. 1, D-50678, Cologne, Germany

<sup>8</sup> Dr. Rolf M. Schwiete Research Unit for Osteoarthritis, Orthopedic University Hospital, Friedrichsheim gGmbH, Marienburgstr. 2, D-60528, Frankfurt/Main, Germany

**Supplementary Table S1.** PCR primers (forward, fwd; reverse, rev) used for cloning of recombinant constructs and their nucleotide sequences. Introduced restriction sites were those of *NheI* (gctagc, fwd), *BamHI* (ggatcc, rev) and *XhoI* (ctcgag, rev), respectively; inserted stop codons (TAA, TGA) are depicted in bold letters as reverse complimentary sequences.

| <b>Protein name</b>                                   | <b>Primers</b> | <b>Sequence 5'→3'</b>                      |
|-------------------------------------------------------|----------------|--------------------------------------------|
| <b><math>\alpha_2\delta</math>-1 FL NTST</b>          | P1 fwd         | AAAgctagcGAGCCGTTCCCTTCG                   |
|                                                       | P2 rev         | TTTggatcc <b>TC</b> ATAACAGGCGGTGTG        |
| <b><math>\alpha_2\delta</math>-1<sub>S</sub> NTST</b> | P1 fwd         | AAAgctagcGAGCCGTTCCCTTCG                   |
|                                                       | P3 rev         | AAActcgag <b>TT</b> ATCCAGAAACACCACCACAGTC |
| <b><math>\alpha_2\delta</math>-1<sub>S</sub> CTST</b> | P4 fwd         | AAAgctagcAGAGCCGTTCCCTTCG                  |
|                                                       | P5 rev         | AAActcgagTCCAGAAACACCACCACAGTC             |
| <b><math>\alpha_2</math> NTST</b>                     | P1 fwd         | AAAgctagcGAGCCGTTCCCTTCG                   |
|                                                       | P6 rev         | TTTggatcc <b>TC</b> ACTCAAGGAGTCGTGG       |

**Supplementary Table S2.** List of primary and secondary antibodies used for ELISA, Western blot (WB) immunocytochemistry (ICC) and cell-based assay.

|                             | <b>Antibody</b>                                               | <b>Clonality</b> | <b>Dilution</b> | <b>Product number/<br/>Manufacturer or<br/>Reference</b>                                                                       | <b>Application</b>    |
|-----------------------------|---------------------------------------------------------------|------------------|-----------------|--------------------------------------------------------------------------------------------------------------------------------|-----------------------|
| <b>primary antibodies</b>   | mouse anti-TSP-2                                              | monoclonal       | 1:500           | 611150/BD Biosciences                                                                                                          | WB, ELISA             |
|                             | mouse anti-strep II-tag                                       | monoclonal       | 1:500           | 2-1507-001/IBA                                                                                                                 | WB                    |
|                             | rabbit anti-human $\alpha_2\delta$ -1                         | polyclonal       | 1:2000          | OSC00098W/Osenses                                                                                                              | WB                    |
|                             | mouse anti-dihydropyridine receptor ( $\alpha_2$ subunit)     | monoclonal       | 1:100-1:500     | D219/Sigma                                                                                                                     | ICC, cell-based assay |
|                             | guinea pig anti-rat TSP-4 antiserum                           | polyclonal       | 1:2000-1:8000   | generated in the Institute for Biochemistry II, Centre for Biochemistry, Medical Faculty, University of Cologne <sup>1-4</sup> | WB, ELISA             |
|                             | chicken anti-rat COMP antiserum                               | polyclonal       | 1:2000          | AP1009/Immundiagnostik                                                                                                         | WB, ELISA             |
| <b>secondary antibodies</b> | rabbit anti-mouse IgG-HRP conjugated                          | polyclonal       | 1:1000          | P0260/Dako                                                                                                                     | WB, ELISA             |
|                             | swine anti-rabbit IgG-HRP conjugated                          | polyclonal       | 1:1000          | P0399/Dako                                                                                                                     | WB                    |
|                             | rabbit anti-guinea pig IgG-HRP conjugated                     | polyclonal       | 1:2000          | A5545/Sigma                                                                                                                    | WB, ELISA             |
|                             | rabbit anti-chicken IgG-HRP conjugated                        | polyclonal       | 1:25000         | 303-035-003/Jackson ImmunoResearch                                                                                             | WB, ELISA             |
|                             | donkey anti-mouse IgG-Alexa Fluor <sup>®</sup> 488 conjugated | polyclonal       | 1:1000          | A21202/Life Technologies                                                                                                       | Cell-based assay      |
|                             | donkey anti-mouse IgG-Alexa Fluor <sup>®</sup> 568 conjugated | polyclonal       | 1:300           | A10037/Life Technologies                                                                                                       | ICC                   |

**Supplementary Fig. S1. Western blot analysis of purified recombinant proteins.**

Immunoblot analysis of **(a)** three full-length TSP proteins, all carrying an N-terminal strep II-tag: TSP-2, TSP-4, and COMP; **(b)** soluble  $\alpha_2\delta-1$  variants carrying either an N-terminal ( $\alpha_2\delta-1_S$  NTST) or a C-terminal ( $\alpha_2\delta-1_S$  CTST) strep II-tag and the product of the thrombin digestion of  $\alpha_2\delta-1_S$  CTST ( $\alpha_2\delta-1_S$  CTST + thrombin) (\*The first and second lanes of the two immunoblots in the lower panel correspond to Fig. 2c). Proteins were separated under non-reducing (-DTT) or reducing (+DTT) conditions on 4-15% **(a)** or 10% **(b)** polyacrylamide gels, respectively. Proteins were detected with anti-TSP-2 antibody, TSP-4 and COMP antisera, rabbit anti- $\alpha_2\delta-1$ , and mouse anti-strep II-tag. Secondary antibodies included the polyclonal rabbit anti-mouse IgG, anti-guinea pig IgG, anti-rabbit IgG, and anti-chicken IgG, all conjugated with horseradish peroxidase (see **Supplementary Table S2** for further information). Molecular weight standard (in kDa) indicated on the left was PageRuler Plus Prestained Protein Ladder (Thermo Fisher Scientific).

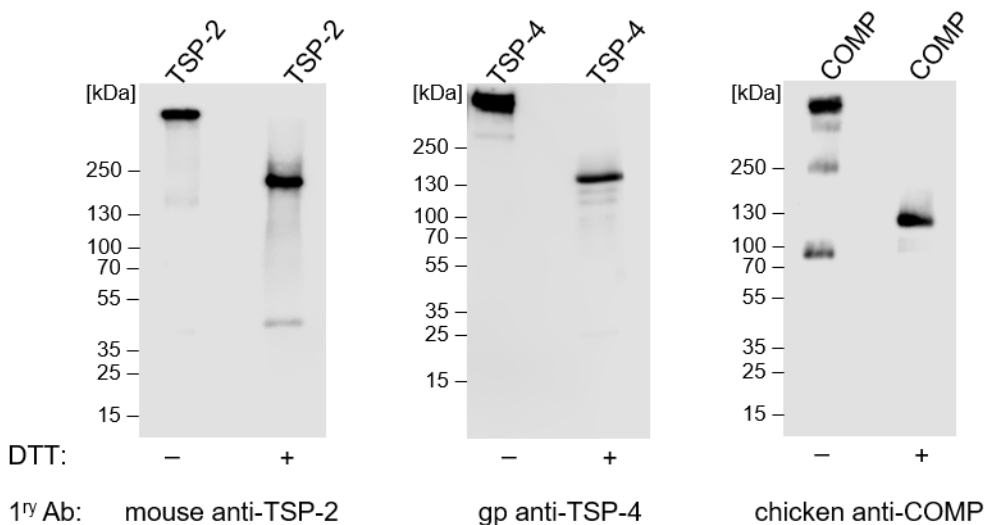

**Fig. S1a.**

The trimeric TSP-2 and the pentameric TSP-4 and COMP appear as high molecular weight bands in the absence of DTT, corresponding to the respective oligomeric proteins (**Fig. 2a and 2b, -DTT; Supplementary Fig. S1a, -DTT**). However, faint bands with a lower *Mr* were occasionally visible under non-reducing conditions for the three full-length TSPs using both the strep II-tag and specific antibodies (**Fig. 2b, -DTT; Supplementary Fig. S1a, -DTT**), representing different oligomerisation states of the proteins as previously reported for COMP<sup>5,6</sup>. For TSP-2, an additional, distinct band is visible under both non-reducing (*Mr* ~86 kDa) and reducing conditions (*Mr* ~44 kDa), upon detection with strep II-tag antibody (**Fig. 2b**), indicating possible minor degradation product of the protein from its N-terminus.

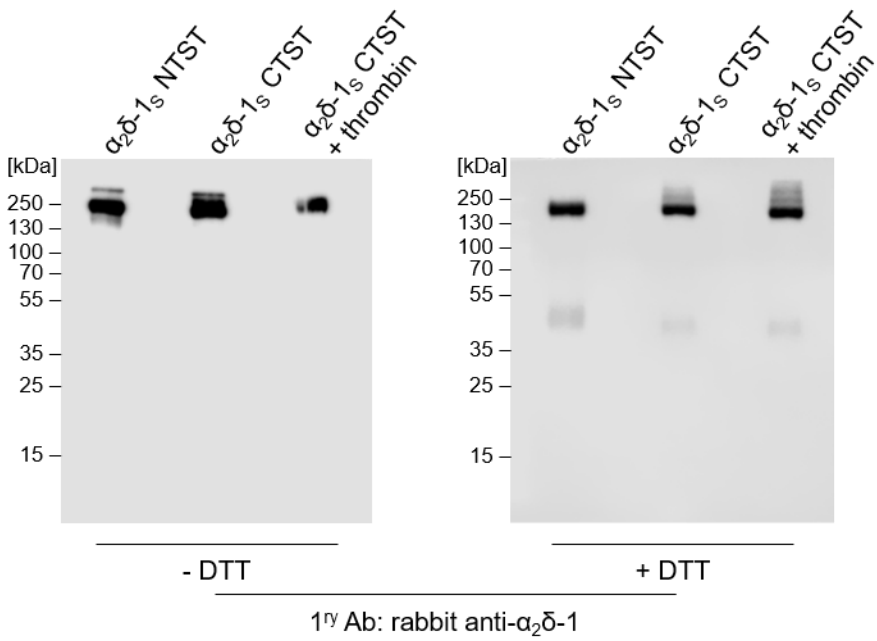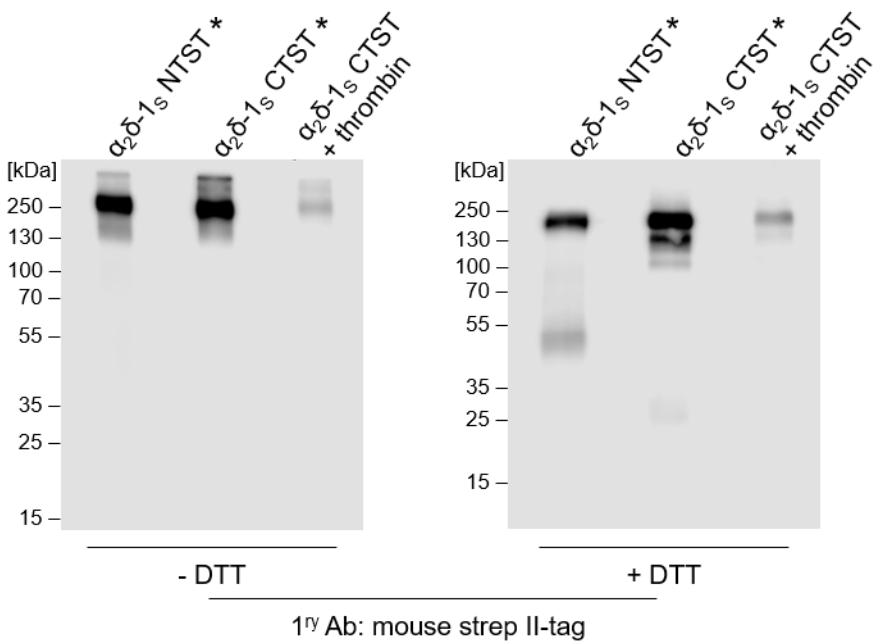

Fig. S1b.

Cleavage of the C-terminal double strep II-tag of  $\alpha_2\delta-1_S$  CTST by thrombin digestion resulted in weaker band upon detection using strep II-tag antibody which recognised the uncleaved strep II-tag sequence remaining after the incomplete digestion of the protein (**Supplementary Fig. S1b**, lower panel). The same sample of digested protein, however, gave a band of comparable intensity to that of undigested protein upon detection with  $\alpha_2\delta-1$ -specific antibody directed towards the N-terminus of the protein (**Supplementary Fig. S1b**, upper panel). This confirms that the weaker bands detected using strep II-tag antibody after thrombin digestion are indeed due to the remaining uncleaved tag in protein molecules and not due to overall degradation of the protein.

**Supplementary Fig. S2. Molecular weight determination of purified recombinant full-length TSPs and  $\alpha_2\delta-1_S$  NTST by MALDI-TOF MS.**

Full-length TSPs, i.e. TSP-2 (**a**), TSP-4 (**b**) and COMP (**c**), and  $\alpha_2\delta-1_S$  NTST (+DTT, **e**) were pre-treated with 10 mM DTT in double-distilled H<sub>2</sub>O overnight at 4 °C. Additional sample of  $\alpha_2\delta-1_S$  NTST (-DTT, **d**) was investigated without DTT pre-treatment. MALDI-TOF MS was done with sinapinic acid as matrix. All spectra showed the signal of  $[M+H]^+$  and  $[M+2H]^{2+}$  of the target proteins. Furthermore, signals of  $[M+3H]^{3+}$  (**c**, **d**) and  $[2M+H]^+$  (**c**) were observed. BSA was used for external calibration of the spectra. Nevertheless, BSA signals were also detected in some spectra of target proteins, marked as \* for signals of  $[BSA+H]^+$  (**a**, **e**).



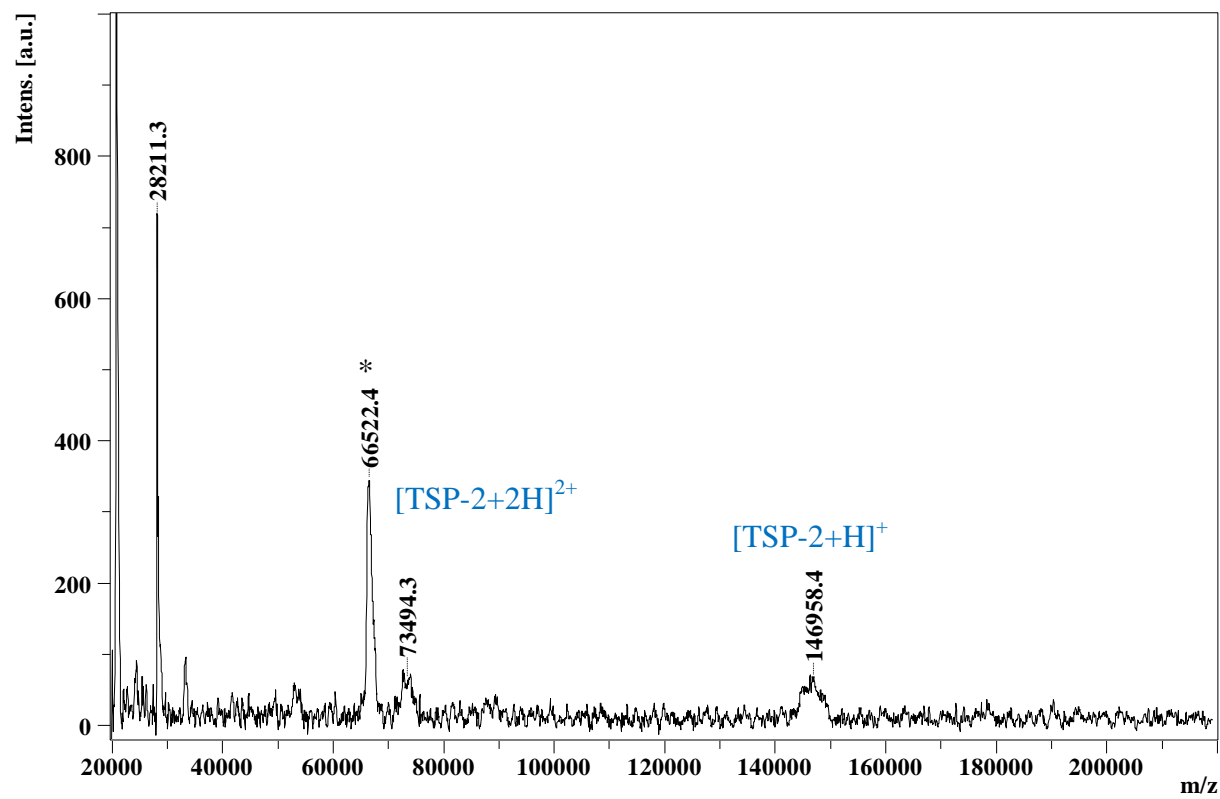

Fig. S2a.

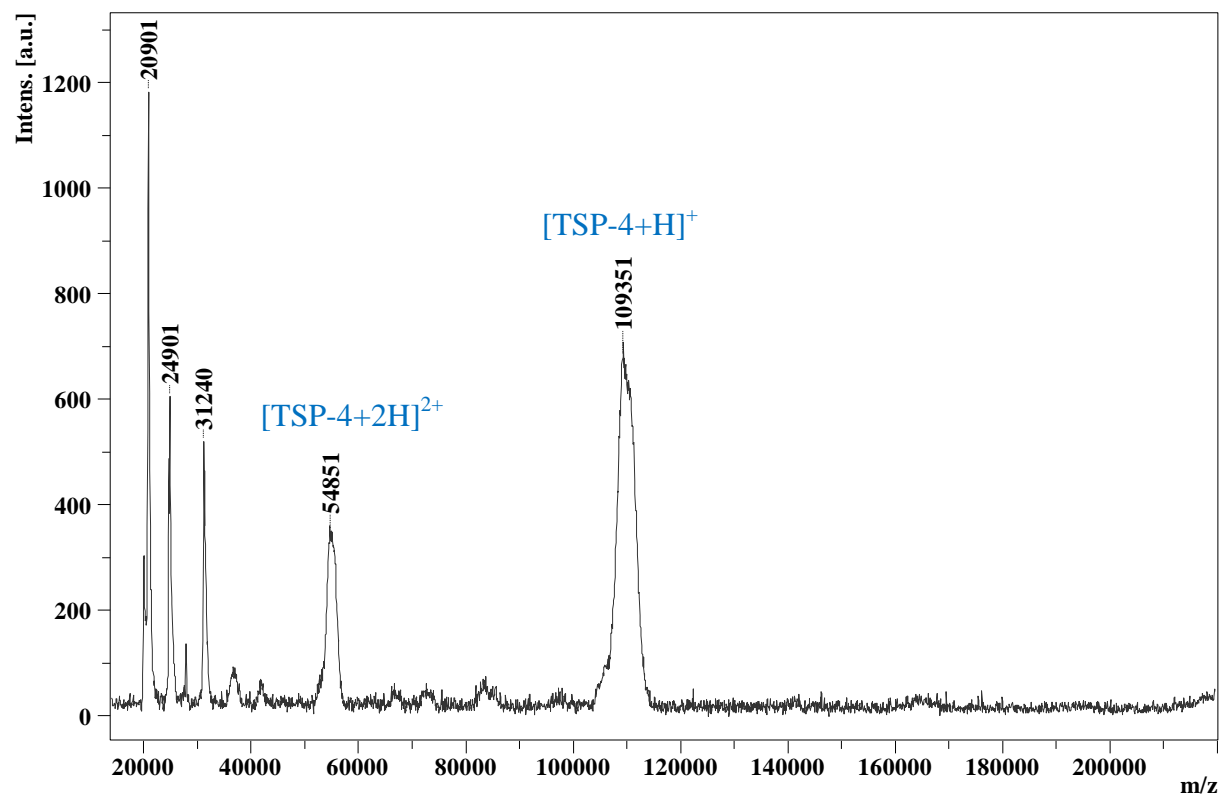

Fig. S2b.

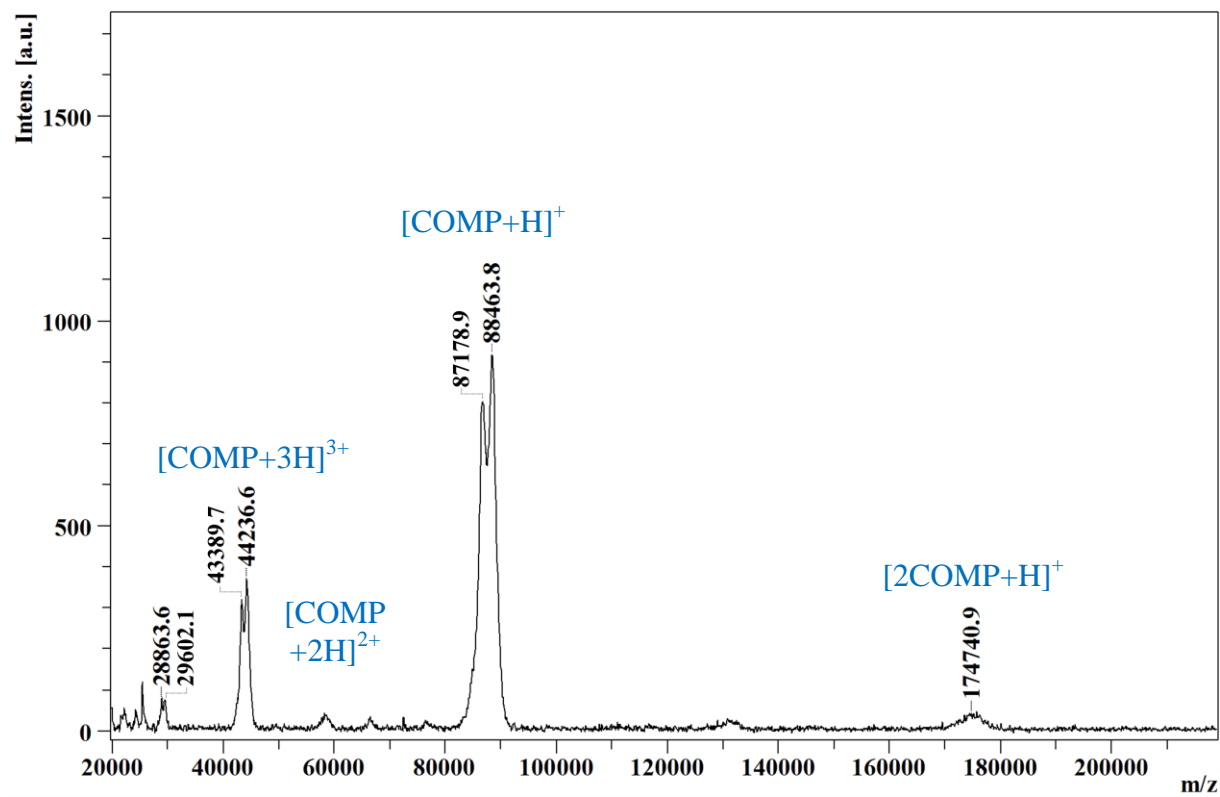

Fig. S2c.

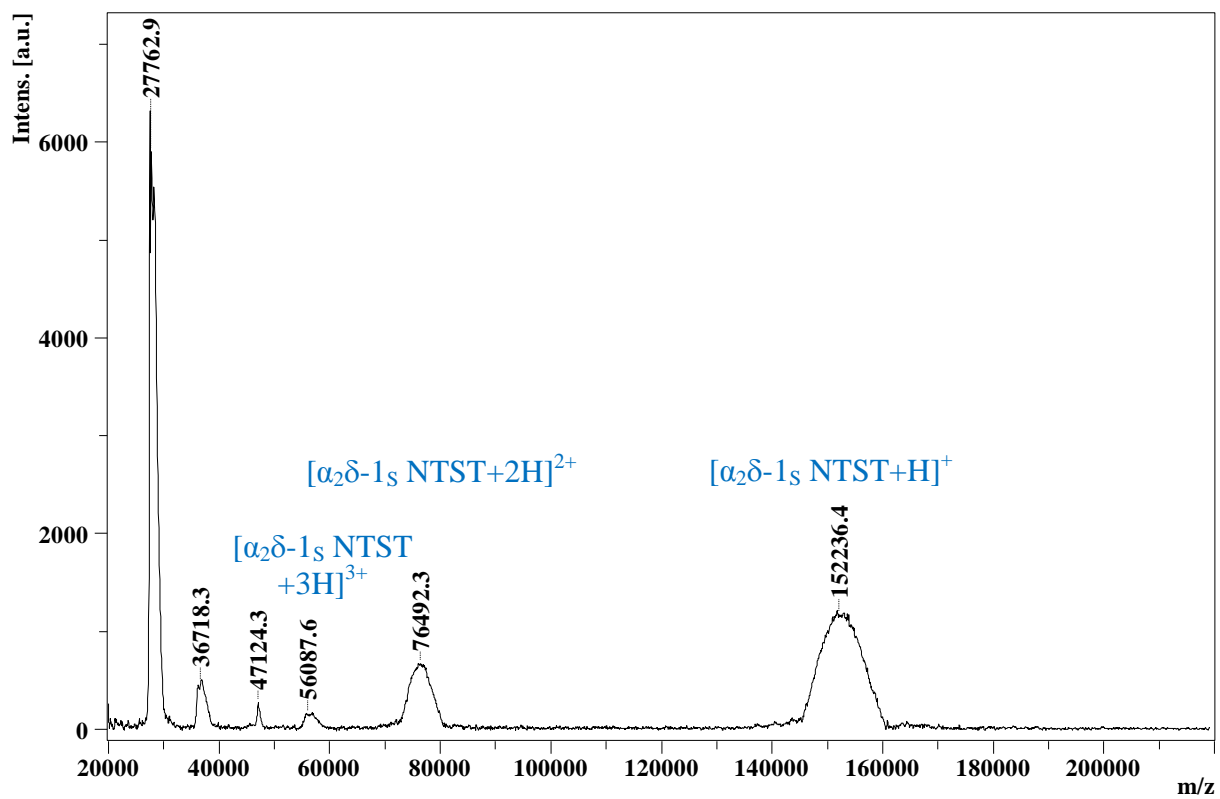

Fig. S2d.

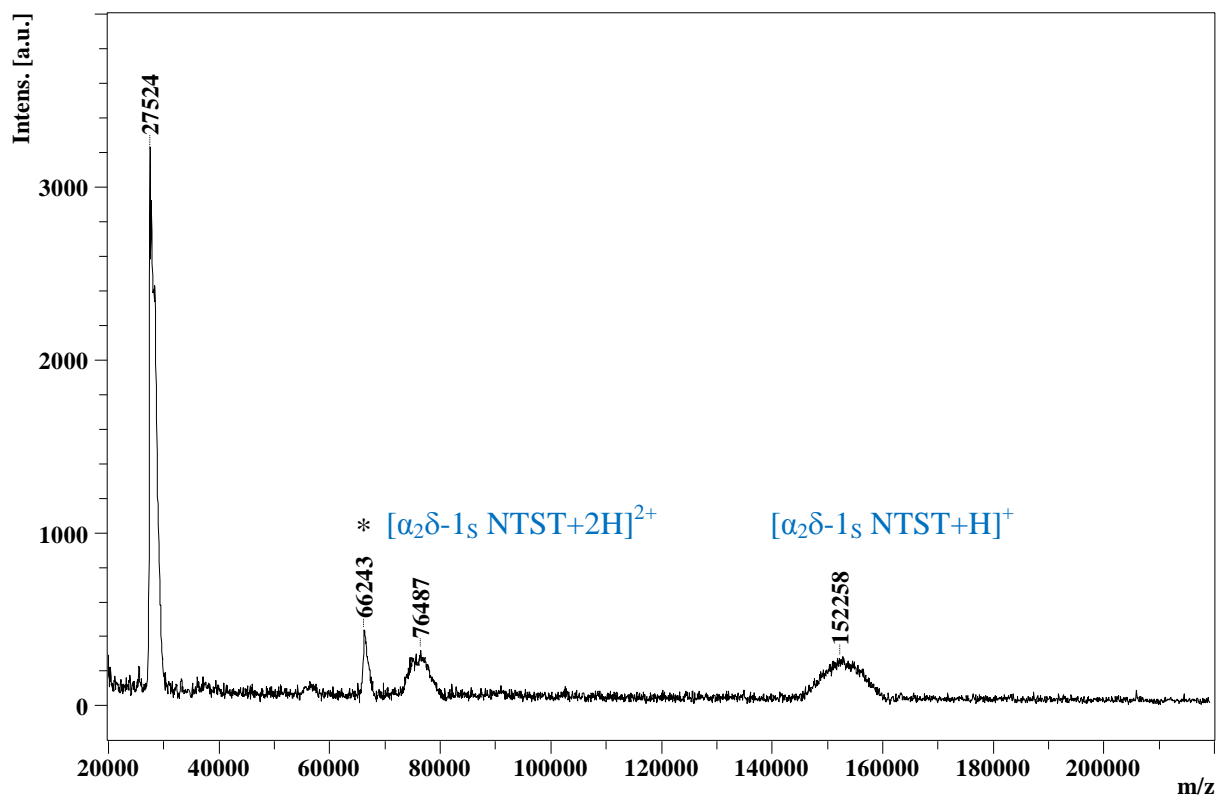

Fig. S2e.

**Supplementary Fig. S3. Surface plasmon resonance-based binding assay of GBP to captured  $\alpha_2\delta-1_S$  NTST.**

(a) A dilution series of GBP (31.25 nM, 62.5 nM, 125 nM, 250 nM, and 500 nM) in PBS pH 7.4 containing 0.05% Tween 20 was sequentially injected over the surface of a sensor chip prepared with  $\alpha_2\delta-1_S$  NTST protein immobilised at 7395 (10  $\mu\text{g/ml}$ ) and 7928 RU (15  $\mu\text{g/ml}$ ) in the first and second experiments, respectively and at 8618 RU (15  $\mu\text{g/ml}$ ) for the third and fourth experiments. The corrected binding response at each GBP concentration after subtraction of non-specific binding response was assigned to RU at 4 sec before stopping the injection of the corresponding GBP concentration. (b) TOP: The corrected binding response, RU, was plotted versus the concentration of GBP, [GPB], and analysed by non-linear regression according to the equation  $\text{RU} = \text{RU}_{\text{max}} * [\text{GBP}]/(K_D + [\text{GBP}])$ , with  $\text{RU}_{\text{max}}$  and  $K_D$  being the maximum binding response and the dissociation constant of the two binding partners, respectively. Bottom: A Hanes-Woolf transformation of the data, i.e. plotting the ratio of [GBP] and RU versus [GBP], and a linear regression showed the linear interdependence of the transformed data and, thus, the equimolar binding of GBP to  $\alpha_2\delta-1_S$  NTST.

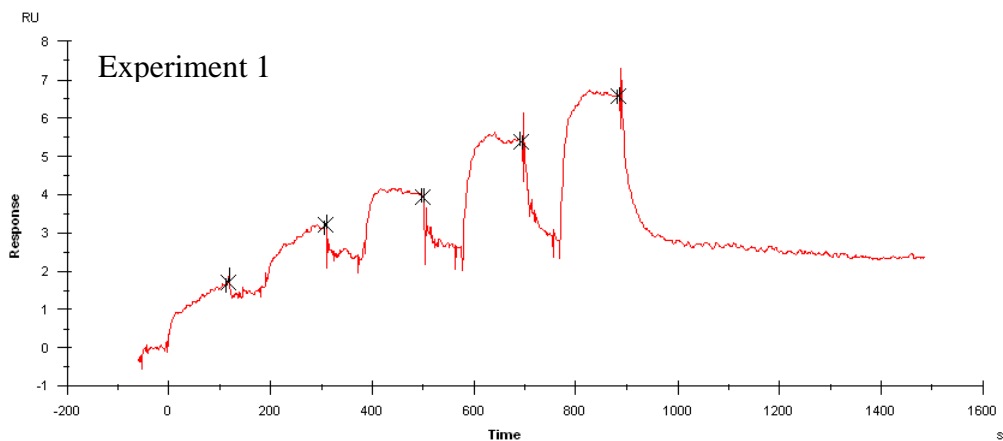

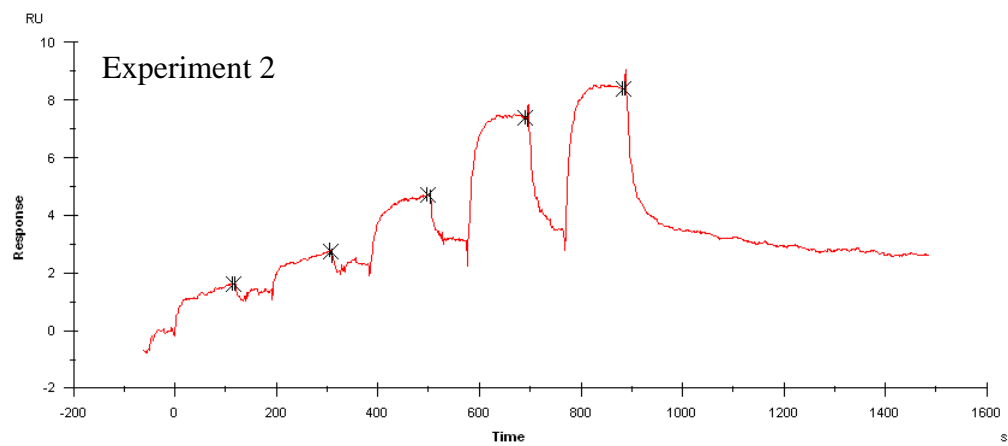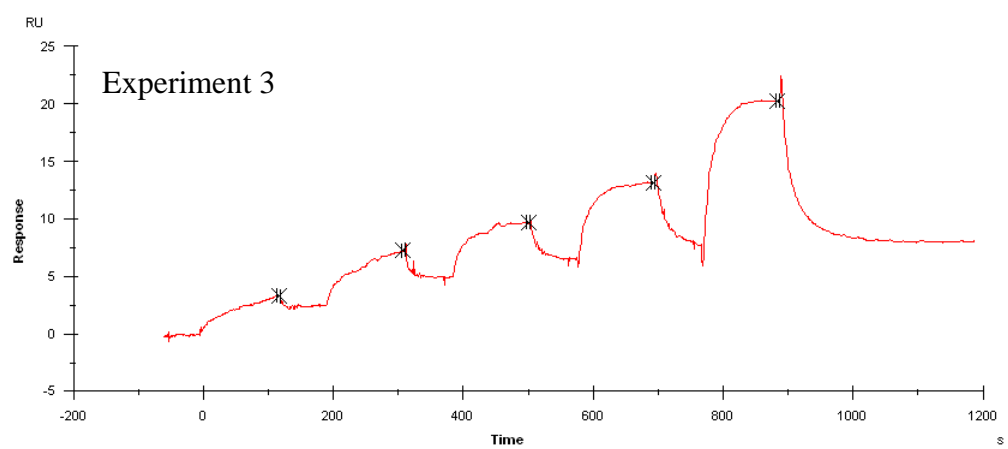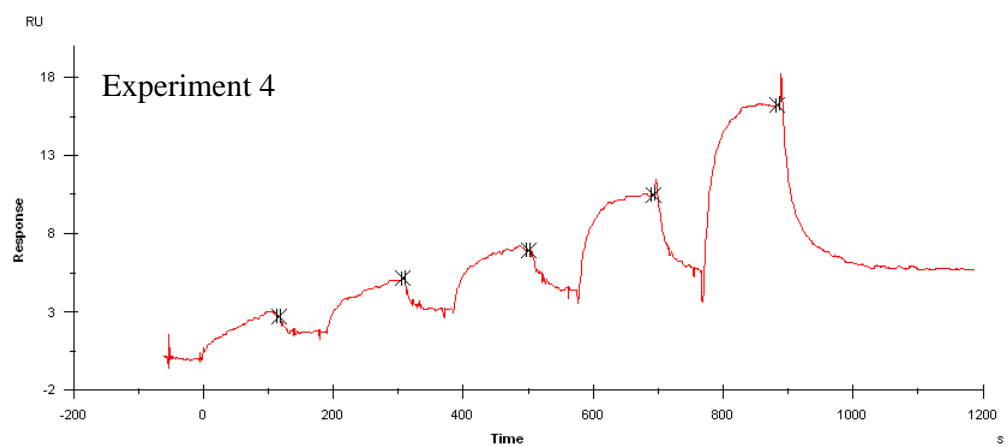

**Fig. S3a**

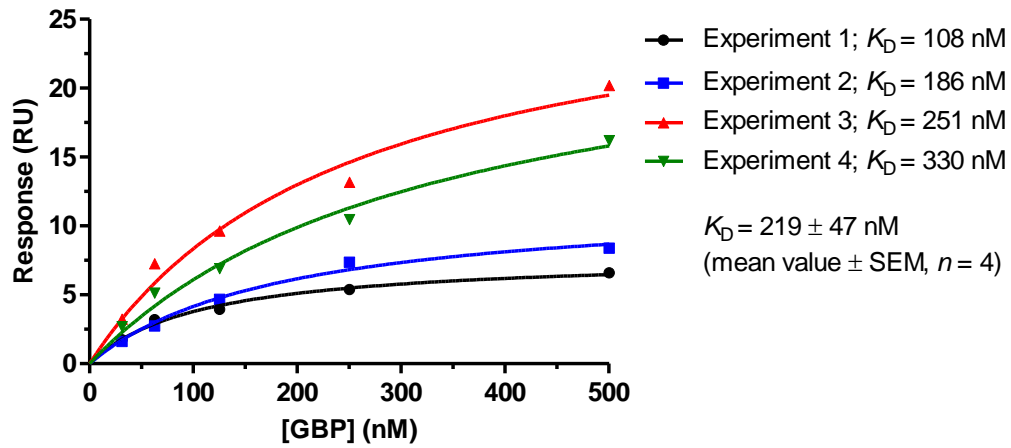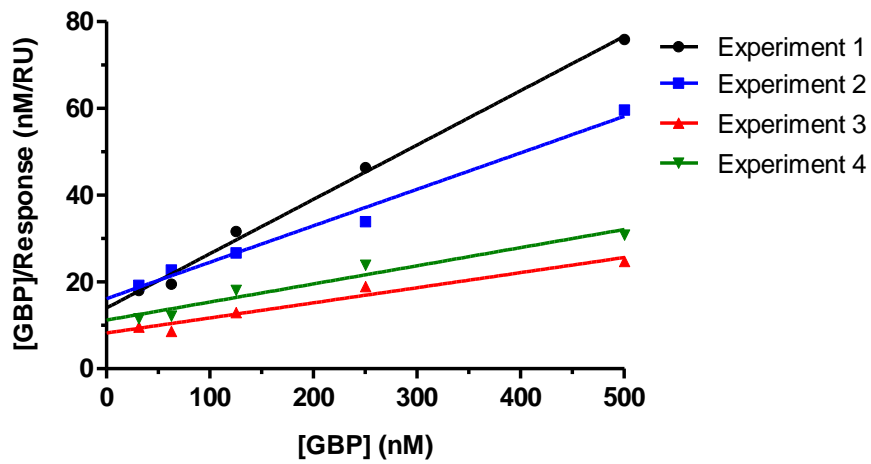

Fig. S3b.



**Supplementary Fig. S4. Binding of recombinant COMP to matrilin-3 in an ELISA-style ligand binding assay.**

50  $\mu$ l of soluble recombinant matrilin-3 NTST (20  $\mu$ g/ml) was coated onto 96-well plates and incubated with increasing concentrations of COMP (0.9-883 nM). Bound ligand was detected with specific COMP antiserum. Data of total and non-specific binding were used to calculate an apparent  $K_D$  value of  $120 \pm 15$  nM (mean value  $\pm$  SEM,  $n = 3$ ), which is similar to the reported apparent  $K_D$  value of 56.3 nM obtained for the interaction of immobilized COMP (2  $\mu$ g/ml) with soluble matrilin-3<sup>7</sup>. Data shown represent mean values  $\pm$  SEM from three independent experiments, each performed in duplicate or triplicate.

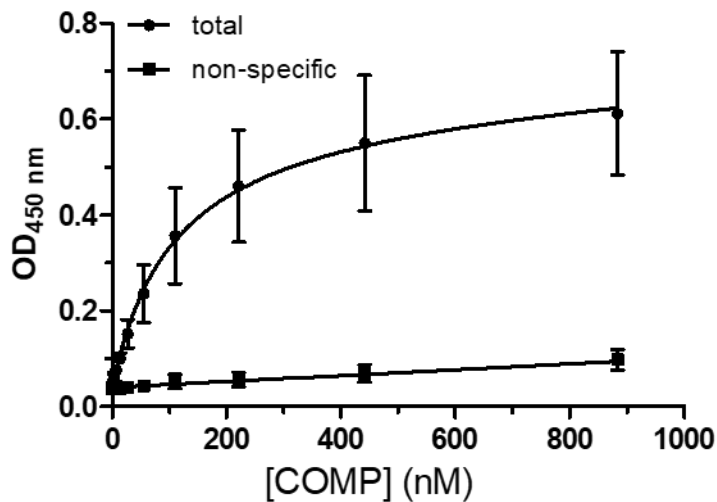

**Fig. S4**

**Supplementary Fig. S5. Fluorescent A555-TSP-4 does not co-localise with over-expressed  $\alpha_2\delta$ -1 FL NTST in HEK293-EBNA cells.**

Representative images of HEK293-EBNA cells transfected either with empty-(upper row) or  $\alpha_2\delta$ -1 FL NTST-expression vector (middle row, with the lower row representing a magnification of the image section within the red square in the left image of the middle row) after incubation with A555-TSP-4 (909 nM). Signals of  $\alpha_2\delta$ -1 FL NTST (left panel, grey and right panel, green), A555-TSP-4 (middle panel, grey and right panel, red) and DAPI (right panel, blue) are shown after membrane permeabilisation.

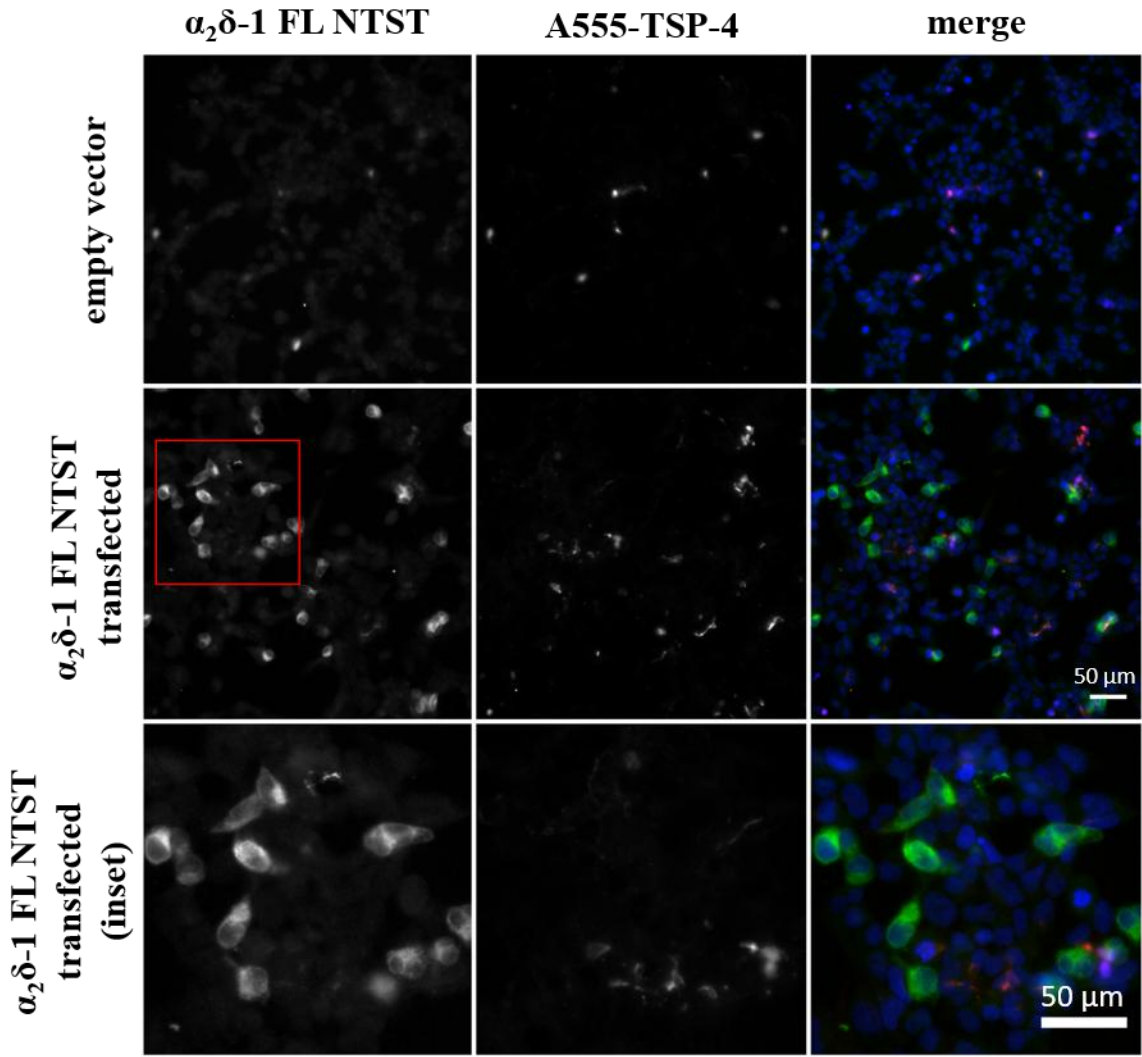

Fig. S5.

## References

- 1 Sodersten, F. *et al.* Ultrastructural immunolocalization of cartilage oligomeric matrix protein, thrombospondin-4, and collagen fibril size in rodent achilles tendon in relation to exercise. *Connect Tissue Res* **48**, 254-262 (2007).
- 2 Kim, D. S. *et al.* Thrombospondin-4 contributes to spinal sensitization and neuropathic pain states. *J Neurosci* **32**, 8977-8987 (2012).
- 3 Dunkle, E. T., Zaucke, F. & Clegg, D. O. Thrombospondin-4 and matrix three-dimensionality in axon outgrowth and adhesion in the developing retina. *Exp Eye Res* **84**, 707-717 (2007).
- 4 Park, J. *et al.* Central Mechanisms Mediating Thrombospondin-4-induced Pain States. *J Biol Chem* **291**, 13335-13348 (2016).
- 5 Thur, J. *et al.* Mutations in cartilage oligomeric matrix protein causing pseudoachondroplasia and multiple epiphyseal dysplasia affect binding of calcium and collagen I, II, and IX. *J Biol Chem* **276**, 6083-6092 (2001).
- 6 Spitznagel, L., Nitsche, D. P., Paulsson, M., Maurer, P. & Zaucke, F. Characterization of a pseudoachondroplasia-associated mutation (His587-->Arg) in the C-terminal, collagen-binding domain of cartilage oligomeric matrix protein (COMP). *Biochem J* **377**, 479-487 (2004).
- 7 Otten, C. *et al.* A matrilin-3 mutation associated with osteoarthritis does not affect collagen affinity but promotes the formation of wider cartilage collagen fibrils. *Hum Mutat* **31**, 254-263 (2010).
